# Supplementary material
Source: publisher figshare collection journal article supplement (https://acs.figshare.com/ndownloader/files/4762225)
Supplement: Supplementary file 1 [file 4762225]

**Supporting Information**

“Biophysical and Structural Characterization of Polyethylenimine-Mediated siRNA Delivery in Vitro”

Amy C. Richards Grayson, Anne M. Doody, and David Putnam

Supporting Table: Summary of transfection conditions used for various commercial reagents.

| Reagent                                            | Reagent<br>( $\mu$ L)     | siRNA<br>( $\mu$ L) | Cell<br>Stock<br>( $\mu$ L) | OPTI-MEM <sup>®</sup> I<br>( $\mu$ L) | Cell<br>Culture<br>Medium<br>( $\mu$ L) | Total<br>Transfectio<br>n<br>Volume<br>( $\mu$ L) |
|----------------------------------------------------|---------------------------|---------------------|-----------------------------|---------------------------------------|-----------------------------------------|---------------------------------------------------|
| siPORT <sup>™</sup> <i>Amine</i> <sup>a</sup>      | 1, 1.5, 2                 | 0.25                | 80                          | 18.75, 18.25, 17.75                   | 0                                       | 100                                               |
| siPORT <sup>™</sup> <i>Lipid</i> <sup>a</sup>      | 0.3, 0.45, 0.6            | 0.25                | 80                          | 19.45, 19.3, 19.15                    | 0                                       | 100                                               |
| RNAiFect <sup>™</sup> <sup>b</sup>                 | 0.1995, 0.399, 0.599      | 0.25                | 40                          | 24.5505, 24.351, 24.151               | 35                                      | 100                                               |
| GeneSilencer <sup>®b,c</sup>                       | 0.3325, 1.33, 2.66, 4.655 | 0.25                | 40                          | 39.4175, 38.42, 37.09, 35.095         | 20                                      | 100                                               |
| X-tremeGENE <sup>a,c</sup>                         | 0.2394, 0.5985, 1.197     | 0.45                | 80                          | 29.3106, 28.9515, 28.353              | 70                                      | 180                                               |
| <i>TransIT</i> <sup>®</sup> -siQUEST <sup>™b</sup> | 0.09, 0.2, 0.4, 0.6       | 0.15                | 40                          | 9.76, 9.65, 9.45, 9.25                | 10                                      | 60                                                |

<sup>a</sup> 50,000 cells/mL stock

<sup>b</sup> 100,000 cells/mL stock

<sup>c</sup> dilute reagent and siRNA in OPTI-MEM<sup>®</sup> I separately, then combine

**SUPPORTING FIGURE 1:** Luciferase expression knockdown kinetics for NIH/3T3 cells. Luciferase expression (RLU) normalized by protein content ( $A_{562}$ ) over time for NIH/3T3 cells transfected with a selected volume of each reagent. On each panel, symbols indicate cells transfected with pCMV-luc and *TransIT*<sup>®</sup>-LT1 (positive controls, ×), and transfected with pCMV-luc and *TransIT*<sup>®</sup>-LT1 followed by anti-luciferase siRNA and a selected volume of each reagent (●). Statistical significance between sample groups indicated by \* ( $p < 0.05$ ) or \*\* ( $p < 0.01$ ). Error bars are the standard error of the mean,  $n = 3$ . a) 2  $\mu$ L/well siPORT<sup>™</sup> *Amine*, b) 0.6  $\mu$ L/well siPORT<sup>™</sup> *Lipid*, c) 0.399  $\mu$ L/well RNAiFect<sup>™</sup>, d) 4.655  $\mu$ L/well GeneSilencer<sup>®</sup>, e) 0.5985  $\mu$ L/well X-tremeGENE, f) 0.2  $\mu$ L/well *TransIT*<sup>®</sup>-siQUEST<sup>™</sup>.

**SUPPORTING FIGURE 2:** Cytotoxicity of siRNA delivery reagents. Cell viability, as measured by normalized absorbance at 490 nm ( $A_{490}$ ), as a function of reagent concentration after 48 h incubation. On each panel, symbols indicate results for HR5-CL11 (■), HeLa (□) and NIH/3T3 (×) cells. Quadratic fits were performed to data points spanning 0–2.5  $\mu$ L/well for *TransIT*<sup>®</sup>-siQUEST<sup>™</sup> and 0–10  $\mu$ L/well for all other reagents.  $IC_{50}$  values were calculated using the Solver function in Excel as the concentration of reagent (% v/v) at which the calculated  $A_{490}$  was one-half the measured  $A_{490}$  for cells that received 0  $\mu$ L of reagent. Error bars are one standard deviation,  $n = 3$ . a) siPORT<sup>™</sup> *Amine*, b) siPORT<sup>™</sup> *Lipid*, c) RNAiFect<sup>™</sup>, d) GeneSilencer<sup>®</sup>, e) X-tremeGENE, f) *TransIT*<sup>®</sup>-siQUEST<sup>™</sup>.

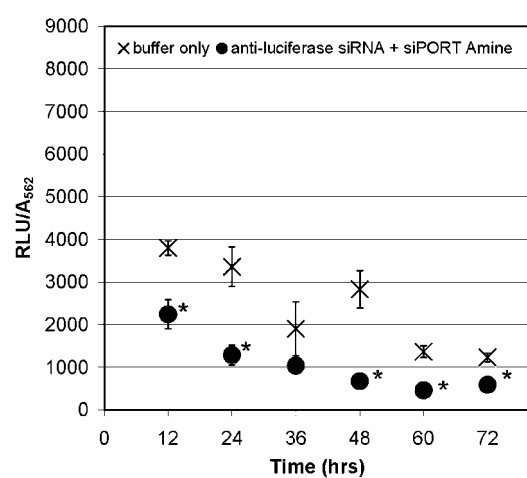

a)

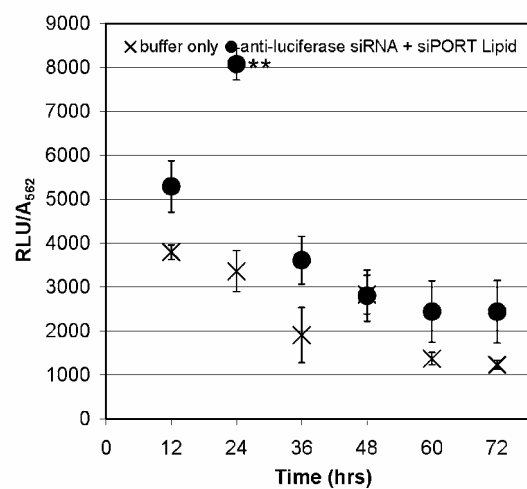

b)

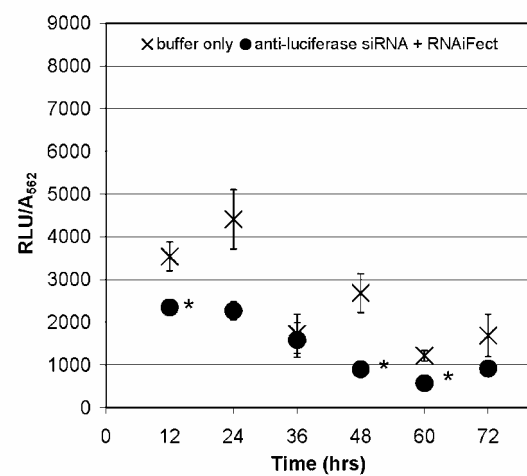

c)

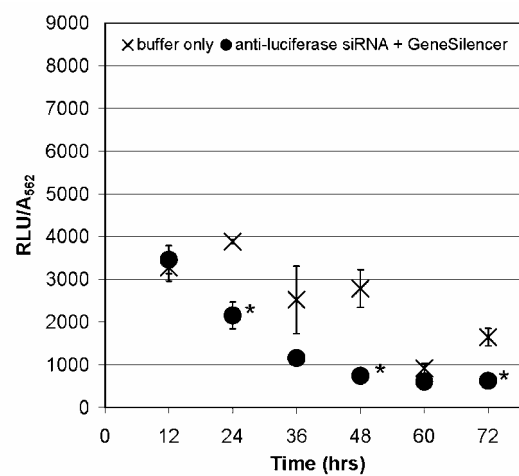

d)

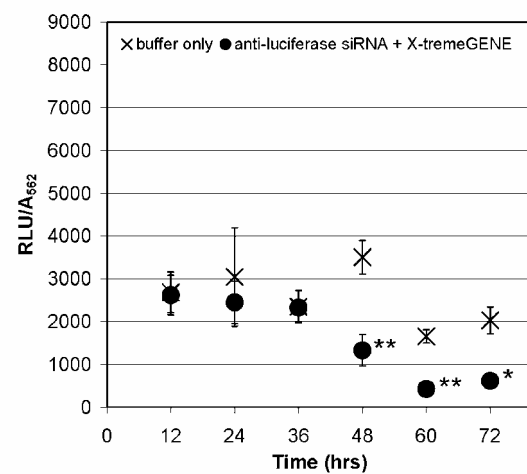

e)

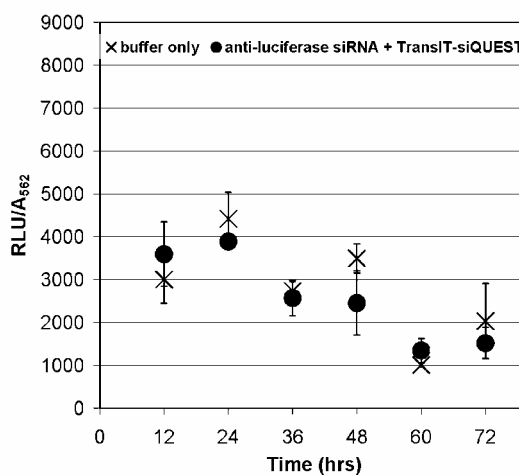

f)

SUPPORTING FIGURE 1

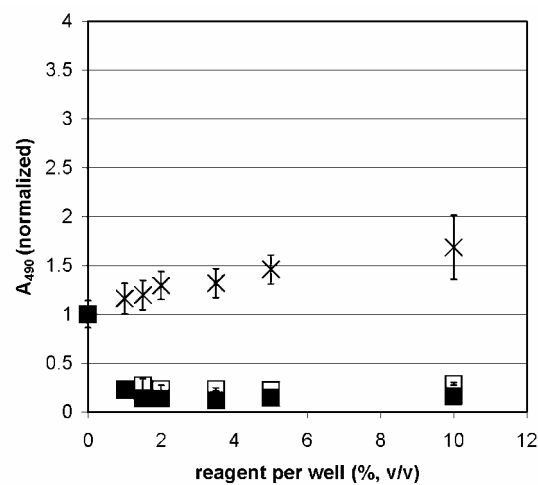

a)

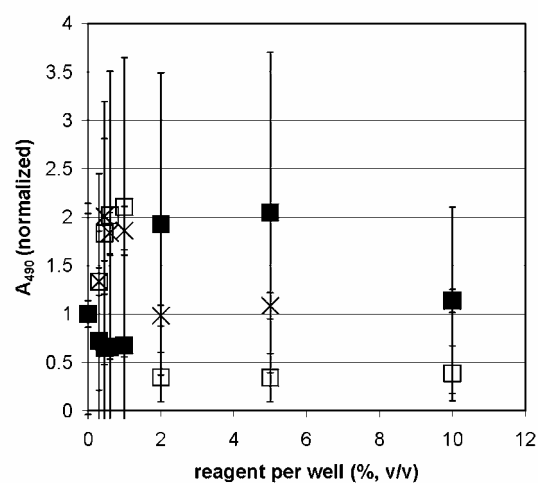

b)

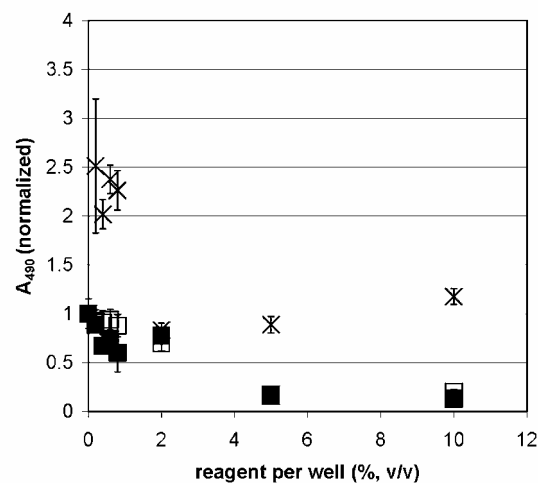

c)

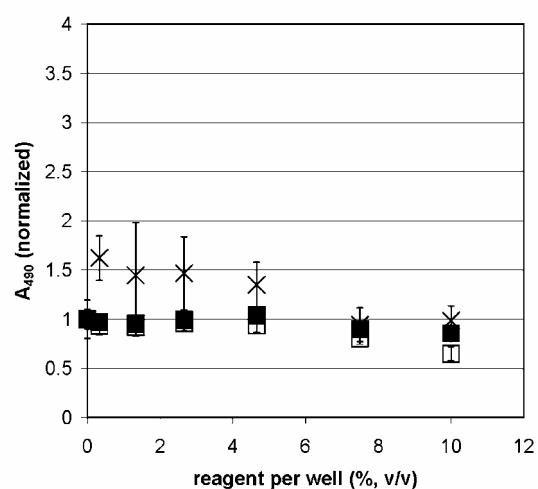

d)

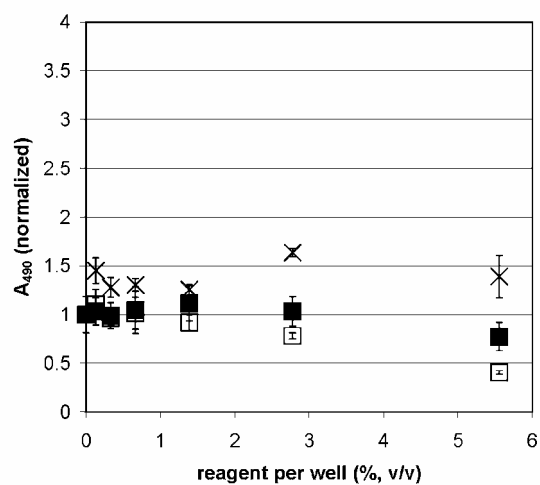

e)

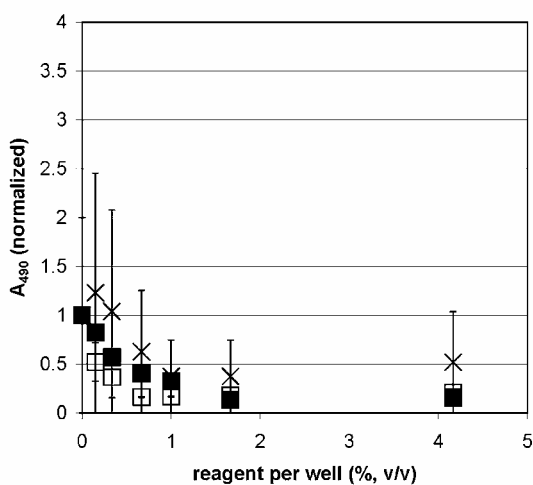

f)

SUPPORTING FIGURE 2
